# Supplementary material
Source: publisher site journal article supplement (http://www.dovepress.com/get_supplementary_file.php?f=291611.docx)

**Figure S1** Effect of miRNA-483-5p overexpression on candidate target protein ALCAM. (**A**) Overexpression of miRNA-483-5p after transfection with mimics at different concentrations (10nM and 50nM). (**B**) Overexpression of miRNA-483-5p decreased ALCAM protein levels in H1975 cells. *P<0.05. **P<0.01.NC, negative control.


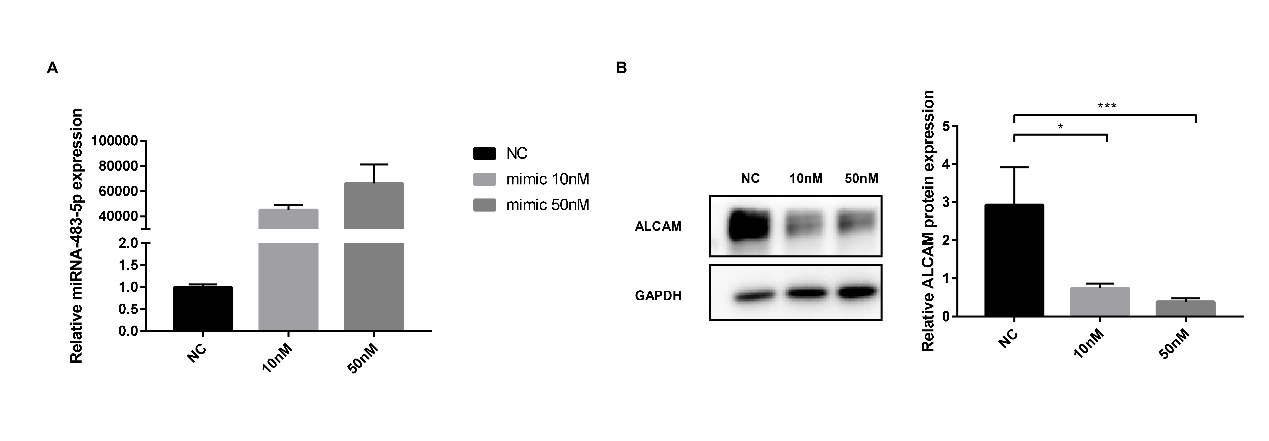

Supplement: Supplementary file 1 [file get_supplementary_file.php]
